# Supplementary material
Source: bioRxiv or medRxiv preprint supplement (https://www.biorxiv.org/highwire/filestream/1000/field_highwire_adjunct_files/0/001552-1.pdf)
Supplement: Supplementary file [file 001552-1.pdf]

## Extended Data

**Extended Data Figure 1: Photographs of analyzed ancient samples.** (A) Loschbour skull; (B) Stuttgart skull, missing the lower right M2 we sampled; (C) excavation at Kanaljorden in Motala, Sweden; (D) Motala 1 in situ.

**A**

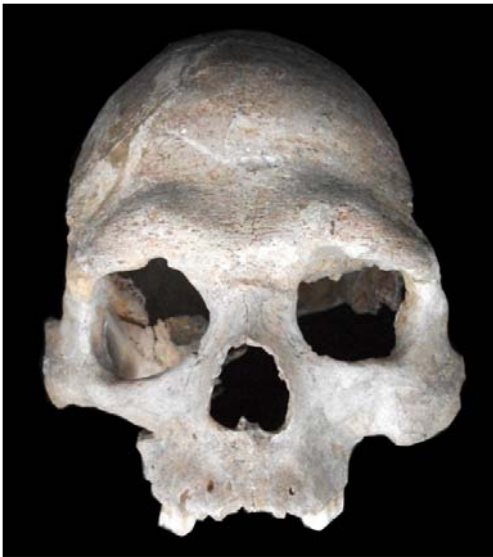

**B**

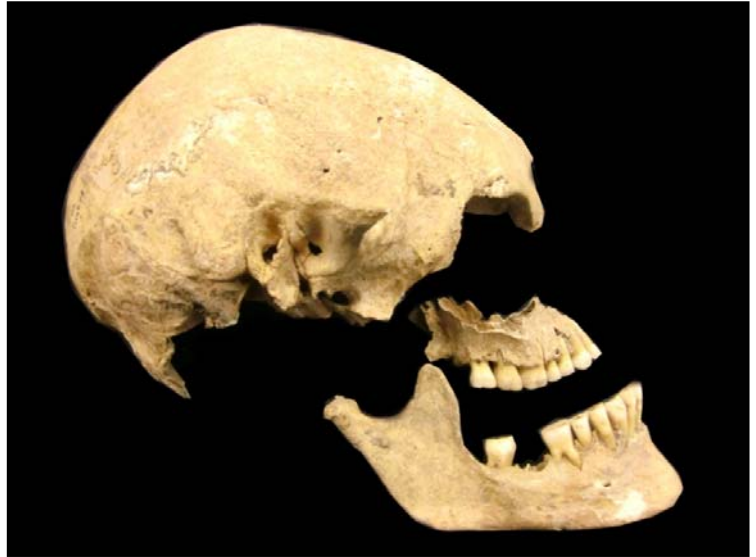

**C**

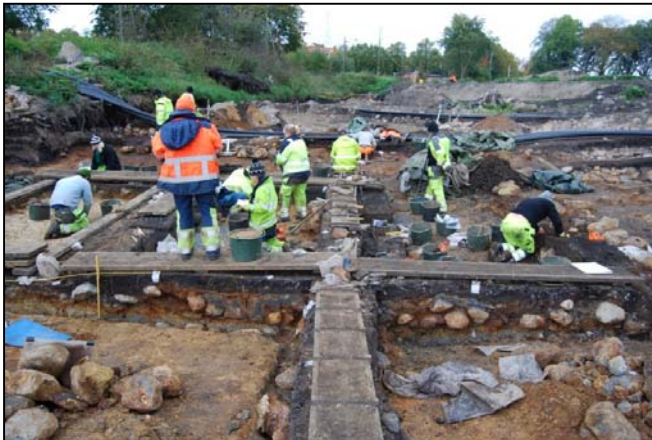

**D**

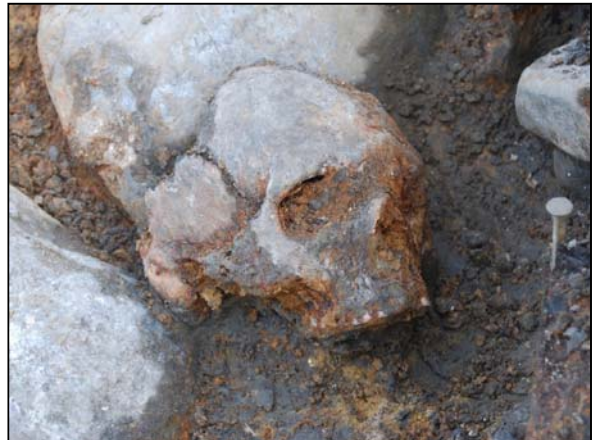

**Extended Data Figure 2: Pairwise Sequential Markovian Coalescent (PSMC) analysis.**

(A) Inference of population size as a function of time, showing a very small recent population size over the most recent period in the ancestry of Loschbour (at least the last 5-10 thousand years). (B) Inferred time since the most recent common ancestor from the PSMC for chromosomes 20, 21, 22 (top to bottom); Stuttgart is plotted on top and Loschbour at bottom.

**A**

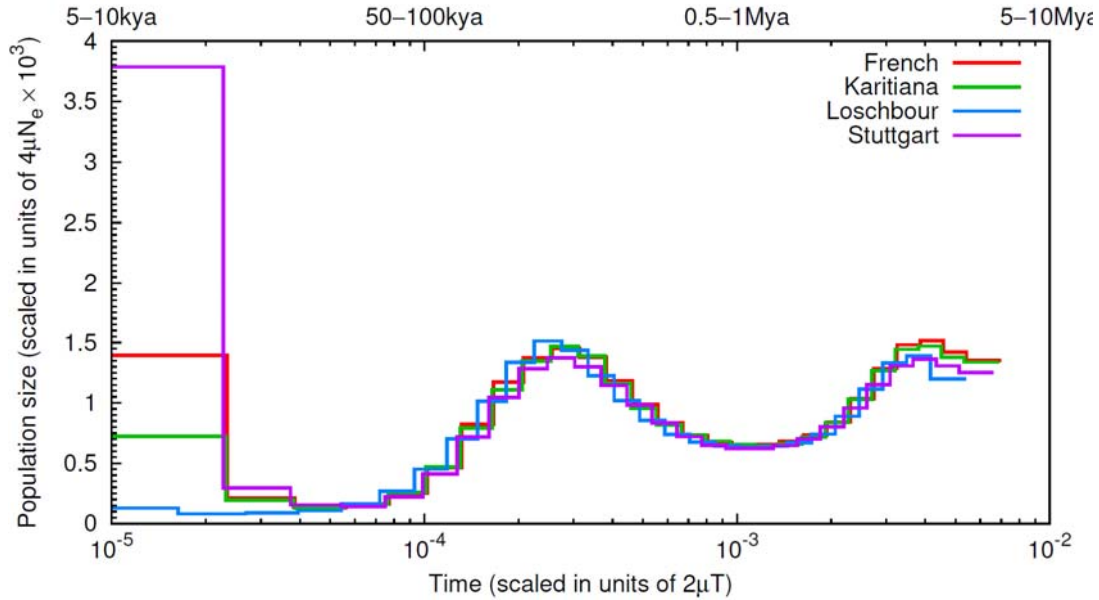

**B**

**B**

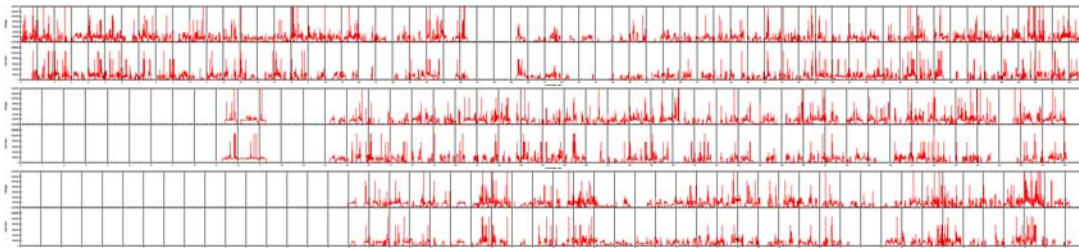

**Extended Data Figure 3: ADMIXTURE analysis (K=2 to K=20).** Ancient samples (Loschbour, Stuttgart, Motala\_merge, Motala12, MA1, and LaBrana) are at left.

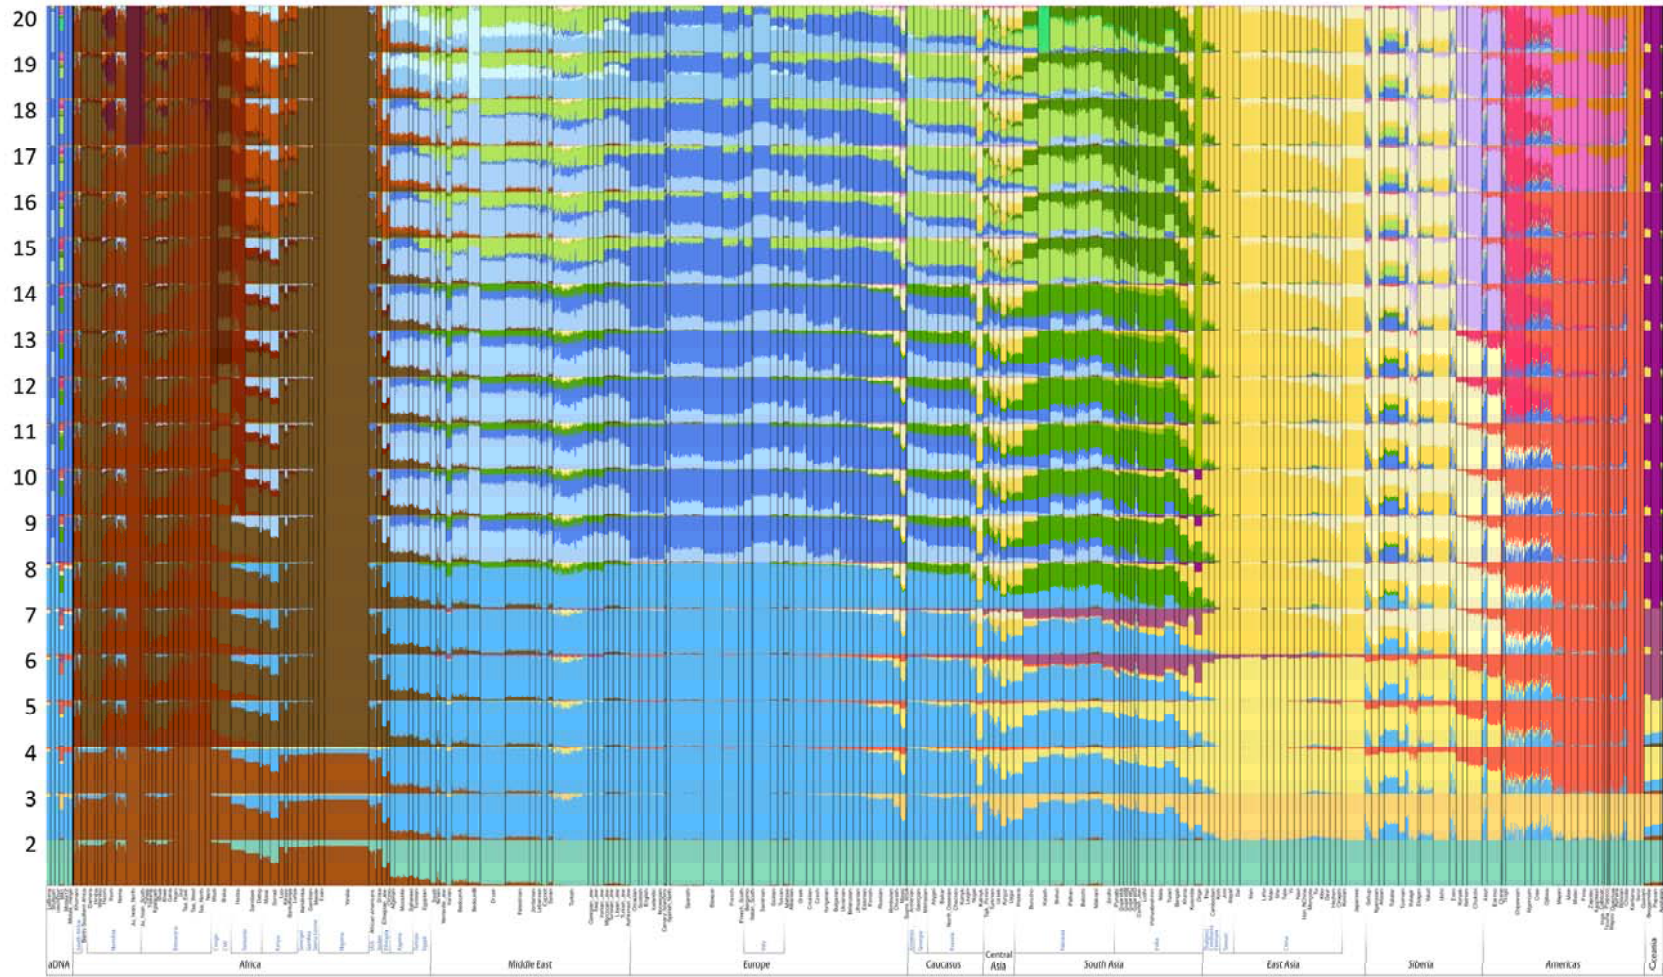



**Extended Data Figure 4: ANE ancestry is present in both Europe and the Near East but WHG ancestry is restricted to Europe, which cannot be due to a single admixture event.**

(x-axis) We computed the statistic  $f_4(\text{Test}, \text{Stuttgart}; \text{MA1}, \text{Chimp})$ , which measures where MA1 shares more alleles with a test population than with Stuttgart. It is positive for most European and Near Eastern populations, consistent with ANE (MA1-related) gene flow into both regions. (y-axis) We computed the statistic  $f_4(\text{Test}, \text{Stuttgart}; \text{Loschbour}, \text{Chimp})$ , which measures whether Loschbour shares more alleles with a test sample than with Stuttgart. Only European populations show positive values of this statistic, providing evidence of WHG (Loschbour-related) admixture only in Europeans.

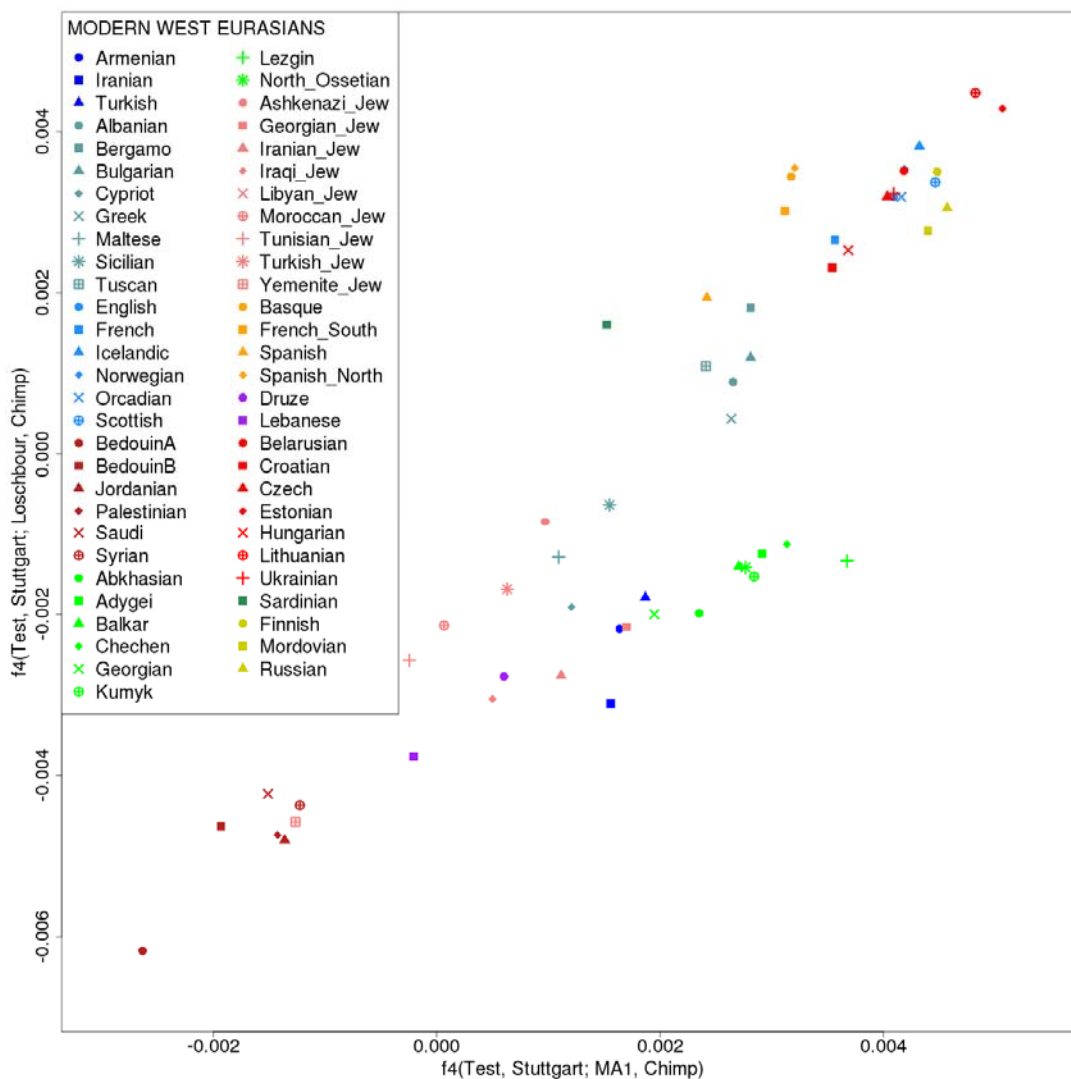

**Extended Data Figure 5: MA1 is the best surrogate for ANE for which we have data.**

Europeans share more alleles with MA1 than with Karitiana, as we see from the fact that in a plot of  $f_4(\text{Test}, \text{BedouinB}; \text{MA1}, \text{Chimp})$  and  $f_4(\text{Test}, \text{BedouinB}; \text{Karitiana}, \text{Chimp})$ , the European cline deviates in the direction of MA1, rather than Karitiana (the slope is  $>1$  and European populations are above the line indicating equality of these two statistics).

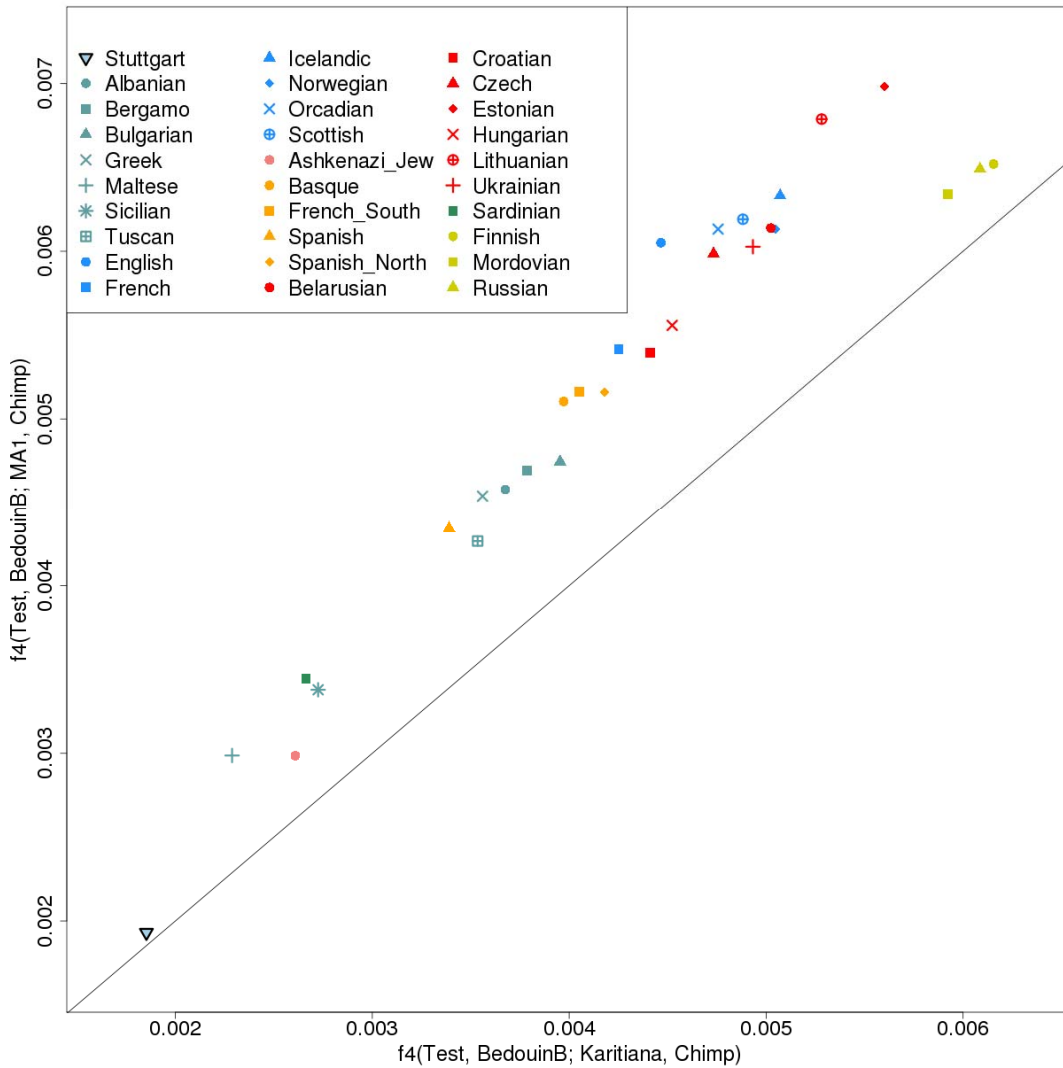

**Extended Data Figure 6: The differential relatedness of West Eurasians to Stuttgart (EEF), Loschbour (WHG), and MA1 (ANE) cannot be explained by two-way mixture.**

We plot on a West Eurasian map the statistic  $f_4(\text{Test}, \text{Chimp}; A_1, A_2)$ , where  $A_1$  and  $A_2$  are a pair of the three ancient samples representing the three ancestral populations of Europe. (A) In both Europe and the Near East/Caucasus, populations from the south have more relatedness to Stuttgart than those from the north where ANE influence is also important. (B) Northern European populations share more alleles with Loschbour than with Stuttgart, as they have additional WHG ancestry beyond what was already present in EEF. (C) We observe a striking contrast between Europe west of the Caucasus and the Near East in degree of relatedness to WHG. In Europe, there is a much higher degree of allele sharing with Loschbour than with MA1, which we ascribe to the 60-80% WHG/(WHG+ANE) ratio in most Europeans that we report in SI14. In contrast, the Near East has no appreciable WHG ancestry but some ANE ancestry, especially in the northern Caucasus. (Jewish populations are marked with a square in this figure to assist in interpretation as their ancestry is often anomalous for their geographic regions.)

A

B

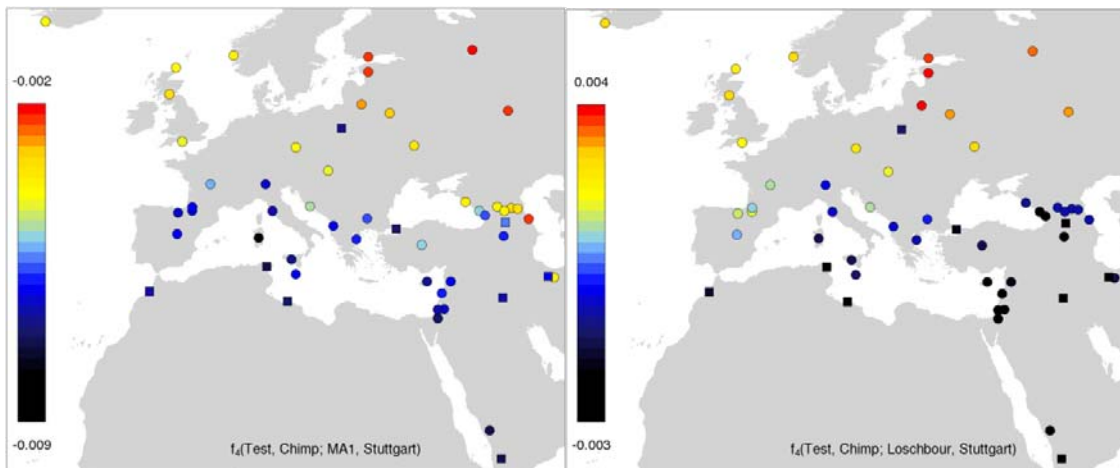

C

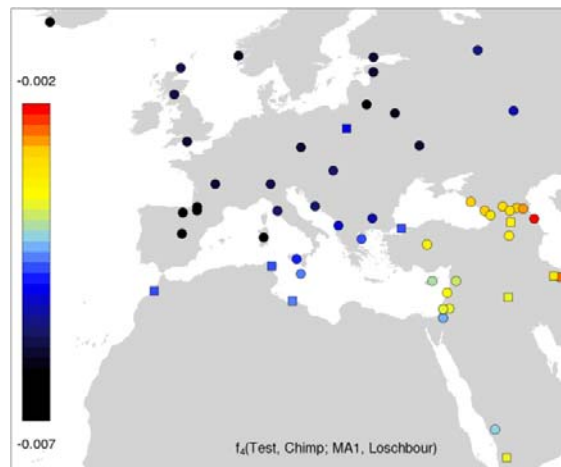

**Extended Data Figure 7: Evidence for Siberian gene flow into far northeastern Europe.**

Some northeastern European populations (Chuvash, Finnish, Russian, Mordovian, Saami) share more alleles with Han Chinese than with other Europeans who are arrayed in a cline from Stuttgart to Lithuanians/Estonians in a plot of  $f_4(\text{Test}, \text{BedouinB}; \text{Han}, \text{Mbuti})$  against  $f_4(\text{Test}, \text{BedouinB}; \text{MA1}, \text{Mbuti})$ .

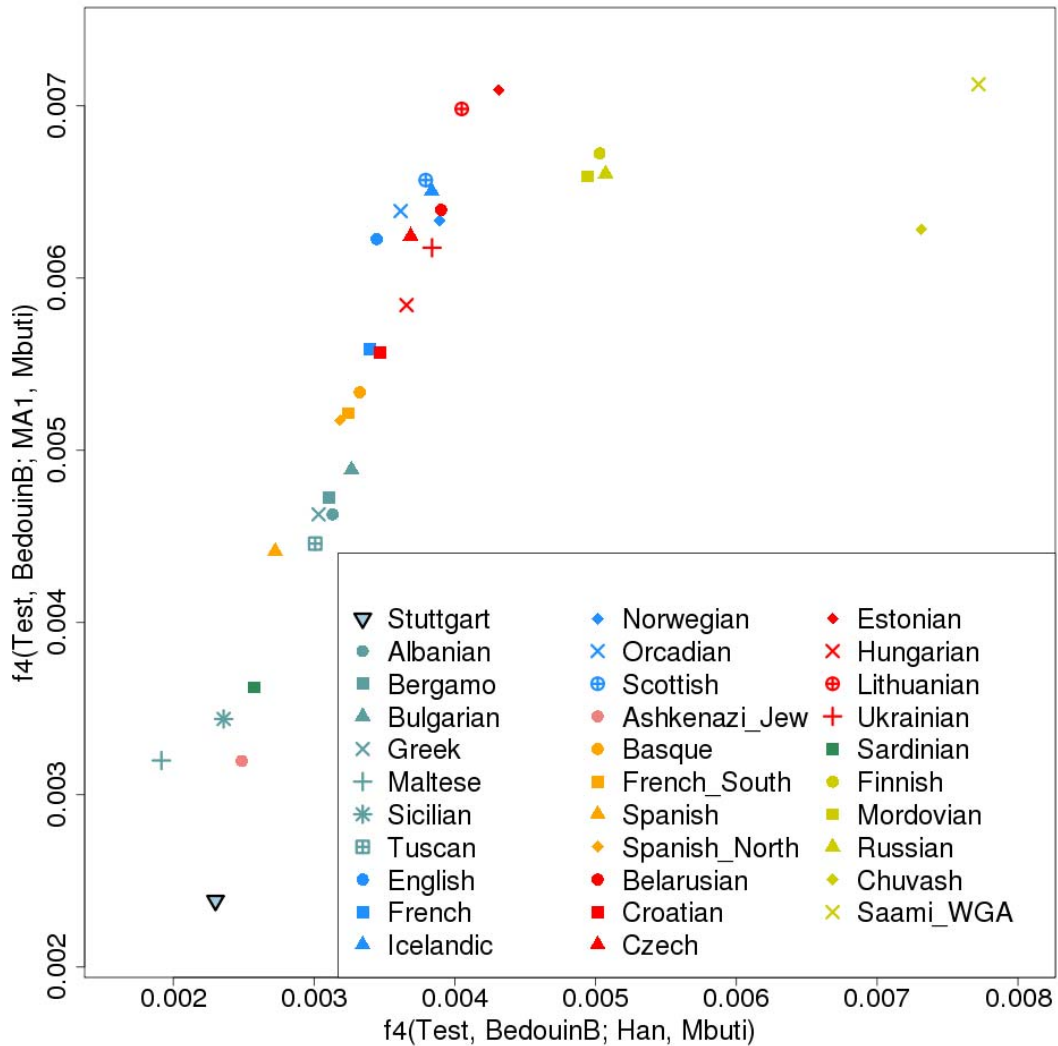

**Extended Data Table 1: West Eurasians genotyped on the Human Origins array and key  $f$ -statistics.**

| X              | Sampling Location |       |        | Lowest $f_3(X; Ref_i, Ref_j)$ |                  |           |       | Lowest $f_3(X; EEf, WHG)$<br>( $Z=0$ and $Zdiff<3$ reported) |                  |           |      |              | Lowest $f_3(X; Near East, WHG)$<br>( $Z<0$ and $Zdiff<3$ reported) |                  |           |       |       | Lowest $f_3(X; EEf, ANE)$<br>( $Z<0$ and $Zdiff<3$ reported) |                  |           |      |         | $f_4(Stuttgart, X; Loschbour, Chimp)$ |         | $f_5(Stuttgart, X; MA1, Chimp)$ |      |
|----------------|-------------------|-------|--------|-------------------------------|------------------|-----------|-------|--------------------------------------------------------------|------------------|-----------|------|--------------|--------------------------------------------------------------------|------------------|-----------|-------|-------|--------------------------------------------------------------|------------------|-----------|------|---------|---------------------------------------|---------|---------------------------------|------|
|                | N                 | Lat.  | Long.  | Ref <sub>i</sub>              | Ref <sub>j</sub> | statistic | Z     | Ref <sub>i</sub>                                             | Ref <sub>j</sub> | statistic | Z    | Zdiff        | Ref <sub>i</sub>                                                   | Ref <sub>j</sub> | statistic | Z     | Zdiff | Ref <sub>i</sub>                                             | Ref <sub>j</sub> | statistic | Z    | Zdiff   | statistic                             | Z       | statistic                       | Z    |
| Abkhasian      | 9                 | 43    | 41.02  | Stu                           | MA1              | -0.0053   | -2.9  |                                                              |                  |           |      | Georgian     | LaB                                                                | -0.0004          | -0.5      | 2.6   | Stu   | MA1                                                          | -0.0053          | -2.9      | 0.0  | 0.0020  | 4.2                                   | -0.0023 | -4.7                            |      |
| Adygei         | 17                | 44    | 39     | Piapoco                       | Stu              | -0.0073   | -5.9  |                                                              |                  |           |      | Stu          | MA1                                                                | -0.0067          | -4.1      | 0.3   | Stu   | MA1                                                          | -0.0067          | -4.1      | 0.3  | 0.0013  | 2.6                                   | -0.0029 | -6.0                            |      |
| Albanian       | 6                 | 41.33 | 19.83  | Stu                           | MA1              | -0.0121   | -7.0  |                                                              |                  |           |      | Iraqi_Jew    | Los                                                                | -0.0090          | -9.1      | 1.7   | Stu   | MA1                                                          | -0.0121          | -7.0      | 0.0  | -0.0009 | -1.8                                  | -0.0027 | -5.4                            |      |
| Armenian       | 10                | 40.19 | 44.55  | GujaratiC                     | Stu              | -0.0070   | -8.2  |                                                              |                  |           |      | Stu          | MA1                                                                | -0.0068          | -4.1      | 0.1   | Stu   | MA1                                                          | -0.0068          | -4.1      | 0.1  | 0.0022  | 4.5                                   | -0.0016 | -3.3                            |      |
| Ashkenazi_Jew  | 7                 | 52.23 | 21.02  | Stu                           | MA1              | -0.0057   | -3.4  |                                                              |                  |           |      | Iraqi_Jew    | Los                                                                | -0.0042          | -4.7      | 1.0   | Stu   | MA1                                                          | -0.0057          | -3.4      | 0.0  | 0.0008  | 1.7                                   | -0.0010 | -2.0                            |      |
| Balkar         | 10                | 43.48 | 43.62  | Piapoco                       | Stu              | -0.0113   | -8.9  |                                                              |                  |           |      | Stu          | MA1                                                                | -0.0092          | -5.5      | 1.1   | Stu   | MA1                                                          | -0.0092          | -5.5      | 1.1  | 0.0014  | 2.9                                   | -0.0027 | -5.6                            |      |
| Basque         | 29                | 43.04 | -0.65  | Iraqi_Jew                     | Los              | -0.0083   | -10.3 | Stu                                                          | Los              | -0.0061   | -3.8 | 1.3          | Iraqi_Jew                                                          | Los              | -0.0083   | -10.3 | 0.0   | Stu                                                          | MA1              | -0.0041   | -2.4 | 2.2     | -0.0034                               | -7.2    | -0.0032                         | -6.7 |
| BedouinA       | 25                | 31    | 35     | Esan                          | Stu              | -0.0162   | -18.2 |                                                              |                  |           |      |              |                                                                    |                  |           |       |       |                                                              |                  |           |      | 0.0062  | 13.0                                  | 0.0026  | 5.4                             |      |
| BedouinB       | 19                | 31    | 35     | Esan                          | Stu              | 0.0089    | 7.8   |                                                              |                  |           |      |              |                                                                    |                  |           |       |       |                                                              |                  |           |      | 0.0046  | 9.3                                   | 0.0019  | 3.9                             |      |
| Belarusian     | 10                | 53.92 | 28.01  | Georgian                      | Los              | -0.0133   | -17.6 |                                                              |                  |           |      | Georgian     | Los                                                                | -0.0133          | -17.6     | 0.0   | Stu   | MA1                                                          | -0.0102          | -6.1      | 1.9  | -0.0035 | -6.9                                  | -0.0042 | -8.6                            |      |
| Bergamo        | 12                | 46    | 10     | Stu                           | MA1              | -0.0106   | -6.2  | Stu                                                          | Los              | -0.0068   | -4.2 | 1.7          | Iraqi_Jew                                                          | Los              | -0.0100   | -11.9 | 0.3   | Stu                                                          | MA1              | -0.0106   | -6.2 | 0.0     | -0.0018                               | -3.9    | -0.0028                         | -5.8 |
| Bulgarian      | 10                | 42.16 | 24.74  | Stu                           | MA1              | -0.0130   | -8.2  | Stu                                                          | LaB              | -0.0074   | -4.5 | 2.8          | Iraqi_Jew                                                          | Los              | -0.0106   | -12.4 | 1.5   | Stu                                                          | MA1              | -0.0130   | -8.2 | 0.0     | -0.0012                               | -2.5    | -0.0028                         | -5.9 |
| Chechen        | 9                 | 43.33 | 45.65  | Stu                           | MA1              | -0.0056   | -3.2  |                                                              |                  |           |      | Georgian     | Los                                                                | -0.0002          | -0.3      | 2.8   | Stu   | MA1                                                          | -0.0056          | -3.2      | 0.0  | 0.0011  | 2.3                                   | -0.0031 | -6.2                            |      |
| Croatian       | 10                | 43.51 | 16.45  | Stu                           | MA1              | -0.0114   | -6.7  | Stu                                                          | Los              | -0.0065   | -3.8 | 2.1          | Iraqi_Jew                                                          | Los              | -0.0112   | -13.0 | 0.2   | Stu                                                          | MA1              | -0.0114   | -6.7 | 0.0     | -0.0023                               | -4.7    | -0.0035                         | -7.4 |
| Cypriot        | 8                 | 35.13 | 33.43  | Stu                           | MA1              | -0.0057   | -3.2  |                                                              |                  |           |      | Yemenite_Jew | Los                                                                | -0.0013          | -1.5      | 2.5   | Stu   | MA1                                                          | -0.0057          | -3.2      | 0.0  | 0.0019  | 3.9                                   | -0.0012 | -2.5                            |      |
| Czech          | 10                | 50.1  | 14.4   | Georgian                      | Los              | -0.0137   | -17.9 | Stu                                                          | Los              | -0.0088   | -5.3 | 3.0          | Georgian                                                           | Los              | -0.0137   | -17.9 | 0.0   | Stu                                                          | MA1              | -0.0121   | -7.2 | 0.9     | -0.0032                               | -6.6    | -0.0040                         | -8.2 |
| Druze          | 39                | 32    | 35     | Stu                           | MA1              | -0.0024   | -1.5  |                                                              |                  |           |      |              |                                                                    |                  |           |       |       |                                                              |                  |           |      | 0.0028  | 5.9                                   | -0.0006 | -1.3                            |      |
| English        | 10                | 50.75 | -2.09  | Iraqi_Jew                     | Los              | -0.0129   | -14.8 | Stu                                                          | Los              | -0.0090   | -5.5 | 2.2          | Iraqi_Jew                                                          | Los              | -0.0129   | -14.8 | 0.0   | Stu                                                          | MA1              | -0.0125   | -7.4 | 0.1     | -0.0032                               | -6.5    | -0.0041                         | -8.5 |
| Estonian       | 10                | 58.54 | 24.89  | Abkhasian                     | Los              | -0.0124   | -15.1 |                                                              |                  |           |      | Abkhasian    | Los                                                                | -0.0124          | -15.1     | 0.0   | Stu   | MA1                                                          | -0.0094          | -5.6      | 1.9  | -0.0043 | -8.5                                  | -0.0051 | -                               |      |
| Finnish        | 7                 | 60.2  | 24.9   | Abkhasian                     | Los              | -0.0102   | -11.3 |                                                              |                  |           |      | Abkhasian    | Los                                                                | -0.0102          | -11.3     | 0.0   | Stu   | MA1                                                          | -0.0078          | -4.4      | 1.4  | -0.0035 | -6.9                                  | -0.0045 | -9.1                            |      |
| French         | 25                | 46    | 2      | Stu                           | MA1              | -0.0131   | -8.4  | Stu                                                          | Los              | -0.0098   | -6.3 | 1.5          | Iraqi_Jew                                                          | Los              | -0.0129   | -16.8 | 0.2   | Stu                                                          | MA1              | -0.0131   | -8.4 | 0.0     | -0.0027                               | -5.6    | -0.0036                         | -7.7 |
| French_South   | 7                 | 43.44 | -0.62  | Iraqi_Jew                     | Los              | -0.0095   | -9.5  | Stu                                                          | LaB              | -0.0089   | -5.0 | 0.3          | Iraqi_Jew                                                          | Los              | -0.0095   | -9.5  | 0.0   | Stu                                                          | MA1              | -0.0086   | -4.8 | 0.4     | -0.0030                               | -6.2    | -0.0031                         | -6.2 |
| Georgian       | 10                | 42.5  | 41.85  | GujaratiC                     | Stu              | -0.0036   | -4.0  |                                                              |                  |           |      |              |                                                                    |                  |           |       |       |                                                              |                  |           |      | 0.0020  | 4.2                                   | -0.0019 | -3.9                            |      |
| Georgian_Jew   | 7                 | 41.72 | 44.78  | GujaratiC                     | Stu              | -0.0009   | -0.9  |                                                              |                  |           |      |              |                                                                    |                  |           |       |       |                                                              |                  |           |      | Stu     | MA1                                   | -0.0002 | -0.1                            | 0.3  |
| Greek          | 20                | 39.84 | 23.17  | Stu                           | MA1              | -0.0118   | -7.4  |                                                              |                  |           |      | Iraqi_Jew    | Los                                                                | -0.0080          | -11.1     | 2.3   | Stu   | MA1                                                          | -0.0118          | -7.4      | 0.0  | -0.0004 | -0.9                                  | -0.0026 | -5.6                            |      |
| Hungarian      | 20                | 47.49 | 19.08  | Stu                           | MA1              | -0.0133   | -8.4  | Stu                                                          | Los              | -0.0087   | -5.6 | 2.2          | Iraqi_Jew                                                          | Los              | -0.0127   | -15.9 | 0.4   | Stu                                                          | MA1              | -0.0133   | -8.4 | 0.0     | -0.0025                               | -5.3    | -0.0037                         | -7.8 |
| Icelandic      | 12                | 64.13 | -21.93 | Abkhasian                     | Los              | -0.0121   | -15.6 | Stu                                                          | Los              | -0.0078   | -4.8 | 2.7          | Abkhasian                                                          | Los              | -0.0121   | -15.6 | 0.0   | Stu                                                          | MA1              | -0.0097   | -5.9 | 1.5     | -0.0038                               | -7.7    | -0.0043                         | -8.9 |
| Iranian        | 8                 | 35.59 | 51.46  | Piapoco                       | Stu              | -0.0094   | -7.2  |                                                              |                  |           |      |              |                                                                    |                  |           |       |       |                                                              |                  |           |      | 0.0031  | 6.3                                   | -0.0016 | -3.2                            |      |
| Iranian_Jew    | 9                 | 35.7  | 51.42  | GujaratiC                     | Stu              | -0.0018   | -2.0  |                                                              |                  |           |      |              |                                                                    |                  |           |       |       |                                                              |                  |           |      | Stu     | MA1                                   | -0.0012 | -0.6                            | 0.2  |
| Iraqi_Jew      | 6                 | 33.33 | 44.42  | Vishwabrahmin                 | Stu              | -0.0026   | -2.6  |                                                              |                  |           |      |              |                                                                    |                  |           |       |       |                                                              |                  |           |      | Stu     | MA1                                   | -0.0009 | -0.5                            | 0.9  |
| Jordanian      | 9                 | 32.05 | 35.91  | Esan                          | Stu              | -0.0145   | -14.3 |                                                              |                  |           |      |              |                                                                    |                  |           |       |       |                                                              |                  |           |      | 0.0030  | 6.1                                   | -0.0005 | -1.0                            |      |
| Kumyk          | 8                 | 43.25 | 46.58  | Piapoco                       | Stu              | -0.0111   | -8.2  |                                                              |                  |           |      |              |                                                                    |                  |           |       |       |                                                              |                  |           |      | 0.0048  | 9.6                                   | 0.0014  | 2.8                             |      |
| Lebanese       | 8                 | 33.82 | 35.57  | Esan                          | Stu              | -0.0105   | -9.4  |                                                              |                  |           |      |              |                                                                    |                  |           |       |       |                                                              |                  |           |      | Stu     | MA1                                   | -0.0109 | -6.5                            | 0.1  |
| Lezgin         | 9                 | 42.12 | 48.18  | Stu                           | MA1              | -0.0100   | -6.0  |                                                              |                  |           |      |              |                                                                    |                  |           |       |       |                                                              |                  |           |      | 0.0015  | 3.1                                   | -0.0028 | -5.7                            |      |
| Libyan_Jew     | 9                 | 32.92 | 13.18  | Esan                          | Stu              | -0.0051   | -4.4  |                                                              |                  |           |      |              |                                                                    |                  |           |       |       |                                                              |                  |           |      | Stu     | MA1                                   | -0.0068 | -3.9                            | 1.9  |
| Lithuanian     | 10                | 54.9  | 23.92  | Abkhasian                     | Los              | -0.0119   | -14.9 |                                                              |                  |           |      | Abkhasian    | Los                                                                | -0.0119          | -14.9     | 0.0   | Stu   | MA1                                                          | -0.0100          | -6.0      | 0.0  | 0.0013  | 2.7                                   | -0.0037 | -7.5                            |      |
| Maltese        | 8                 | 35.94 | 14.38  | Stu                           | MA1              | -0.0086   | -4.9  |                                                              |                  |           |      | Yemenite_Jew | Los                                                                | -0.0051          | -6.0      | 2.0   | Stu   | MA1                                                          | -0.0086          | -4.9      | 0.0  | 0.0013  | 2.7                                   | -0.0011 | -2.3                            |      |
| Mordovian      | 10                | 54.18 | 45.18  | Abkhasian                     | Los              | -0.0115   | -14.4 |                                                              |                  |           |      | Abkhasian    | Los                                                                | -0.0115          | -14.4     | 0.0   | Stu   | MA1                                                          | -0.0113          | -6.6      | 0.3  | -0.0028 | -5.5                                  | -0.0044 | -9.0                            |      |
| Moroccan_Jew   | 6                 | 34.02 | -6.84  | Esan                          | Stu              | -0.0062   | -5.2  |                                                              |                  |           |      | Yemenite_Jew | Los                                                                | -0.0021          | -2.2      | 2.9   | Stu   | MA1                                                          | -0.0032          | -1.7      | 1.4  | 0.0021  | 4.3                                   | -0.0001 | -0.1                            |      |
| North_Ossetian | 10                | 43.02 | 44.65  | Piapoco                       | Stu              | -0.0093   | -7.2  |                                                              |                  |           |      |              |                                                                    |                  |           |       |       |                                                              |                  |           |      | 0.0014  | 2.9                                   | -0.0028 | -5.6                            |      |
| Norwegian      | 11                | 60.36 | 5.36   | Georgian                      | Los              | -0.0120   | -14.8 |                                                              |                  |           |      | Georgian     | Los                                                                | -0.0120          | -14.8     | 0.0   | Stu   | MA1                                                          | -0.0093          | -5.4      | 1.4  | -0.0035 | -7.3                                  | -0.0042 | -8.7                            |      |
| Orcadian       | 13                | 59    | -3     | Armenian                      | Los              | -0.0102   | -13.4 | Stu                                                          | Los              | -0.0059   | -3.6 | 2.5          | Armenian                                                           | Los              | -0.0102   | -13.4 | 0.0   | Stu                                                          | MA1              | -0.0098   | -5.9 | 0.5     | -0.0032                               | -6.7    | -0.0042                         | -8.6 |
| Palestinian    | 38                | 32    | 35     | Esan                          | Stu              | -0.0120   | -13.2 |                                                              |                  |           |      |              |                                                                    |                  |           |       |       |                                                              |                  |           |      | 0.0047  | 10.2                                  | 0.0014  | 3.1                             |      |
| Russian        | 22                | 61    | 40     | Chukchi                       | Los              | -0.0119   | -11.3 |                                                              |                  |           |      | Abkhasian    | Los                                                                | -0.0119          | -17.1     | 0.0   | Stu   | MA1                                                          | -0.0106          | -6.6      | 0.8  | -0.0030 | -6.2                                  | -0.0046 | -9.4                            |      |
| Sardinian      | 27                | 40    | 9      | Stu                           | LaB              | -0.0044   | -2.6  | Stu                                                          | LaB              | -0.0044   | -2.6 | 0.0          | Iraqi_Jew                                                          | Los              | -0.0033   | -4.2  | 0.0   | Stu                                                          | MA1              | -0.0035   | -2.1 | 0.3     | -0.0016                               | -3.4    | -0.0015                         | -3.3 |
| Saudi          | 8                 | 18.49 | 42.52  | Kgalagadi                     | Stu              | -0.0042   | -3.6  |                                                              |                  |           |      |              |                                                                    |                  |           |       |       |                                                              |                  |           |      | 0.0042  | 8.6                                   | 0.0015  | 3.1                             |      |
| Scottish       | 4                 | 56.04 | -3.94  | Iraqi_Jew                     | Los              | -0.0103   | -8.3  |                                                              |                  |           |      | Iraqi_Jew    | Los                                                                | -0.0103          | -8.3      | 0.0   | Stu   | MA1                                                          | -0.0090          | -4.7      | 0.7  | -0.0034 | -6.4                                  | -0.0045 | -8.7                            |      |
| Sicilian       | 11                | 37.59 | 13.77  | Stu                           | MA1              | -0.0108   | -6.5  |                                                              |                  |           |      | Yemenite_Jew | Los                                                                | -0.0066          | -8.1      | 2.4   | Stu   | MA1                                                          | -0.0108          | -6.5      | 0.0  | 0.0006  | 1.3                                   | -0.0015 | -3.2                            |      |
| Spanish        | 53                | 40.43 | -2.83  | Iraqi_Jew                     | Los              | -0.0126   | -17.8 | Stu                                                          | Los              | -0.0104   | -6.8 | 1.4          | Iraqi_Jew                                                          | Los              | -0.0126   | -17.8 | 0.0   | Stu                                                          | MA1              | -0.0120   | -7.6 | 0.3     | -0.0019                               | -4.2    | -0.0024                         | -5.2 |
| Spanish_North  | 5                 | 42.8  | -2.7   | Iraqi_Jew                     | Los              | -0.0112   | -9.9  | Stu                                                          | Los              | -0.0102   | -5.4 | 0.5          | Iraqi_Jew                                                          | Los              | -0.0112   | -9.9  | 0.0   | Stu                                                          | MA1              | -0.0082   | -4.4 | 1.3     | -0.0035                               | -6.9    | -0.0032                         | -6.4 |
| Syrian         | 8                 | 35.13 | 36.87  | Esan                          | Stu              | -0.0101   | -8.7  |                                                              |                  |           |      |              |                                                                    |                  |           |       |       |                                                              |                  |           |      | 0.0044  | 8.6                                   | 0.0012  | 2.4                             |      |
| Tunisian_Jew   | 7                 | 36.8  | 10.18  | Gambian                       | Stu              | -0.0026   | -2.0  |                                                              |                  |           |      |              |                                                                    |                  |           |       |       |                                                              |                  |           |      |         |                                       |         |                                 |      |



**Extended Data Table 2: Confirmation of key findings on transversions and on whole genome sequence data.**

| Interpretation                                                                                        | D(A, B; C, D) on Human Origins genotype data |           |           |           |                        |        |                                 |         | D(A, B; C, D) on whole genome sequence data transversions |           |            |            |           |      |
|-------------------------------------------------------------------------------------------------------|----------------------------------------------|-----------|-----------|-----------|------------------------|--------|---------------------------------|---------|-----------------------------------------------------------|-----------|------------|------------|-----------|------|
|                                                                                                       | A                                            | B         | C         | D         | 594,924 SNPs statistic | Z      | 110,817 transversions statistic | Z       | A                                                         | B         | C          | D          | statistic | Z    |
| Stuttgart has Near Eastern ancestry                                                                   | Stuttgart                                    | Armenian  | Loschbour | Chimp     | 0.0219                 | 4.5    | 0.0189                          | 2.9     |                                                           |           |            |            |           |      |
| Europeans have more WHG-related ancestry than Stuttgart                                               | Stuttgart                                    | French    | Loschbour | Chimp     | -0.0266                | -5.7   | -0.031                          | -5.0    | Stuttgart                                                 | French2   | Loschbour  | Chimp      | -0.03     | -4.7 |
|                                                                                                       | Lithuanian                                   | Stuttgart | Loschbour | Chimp     | 0.0446                 | 9.1    | 0.0477                          | 7.2     |                                                           |           |            |            |           |      |
| West Eurasians have more ANE-related ancestry than Stuttgart                                          | French                                       | Stuttgart | MA1       | Chimp     | 0.0367                 | 7.7    | 0.0386                          | 5.5     | French2                                                   | Stuttgart | MA1        | Chimp      | 0.037     | 6.4  |
|                                                                                                       | Lezgin                                       | Stuttgart | MA1       | Chimp     | 0.0372                 | 7.6    | 0.0409                          | 5.6     |                                                           |           |            |            |           |      |
| MA1 is a better surrogate of ANE ancestry than Karitiana                                              | French                                       | Chimp     | MA1       | Karitiana | 0.0207                 | 4.5    | 0.0214                          | 2.8     | French2                                                   | Chimp     | MA1        | Karitiana2 | 0.026     | 3.8  |
| Eastern non-Africans closer to WHG/ANE/SHG than to EEF                                                | Loschbour                                    | Stuttgart | Onge      | Chimp     | 0.0196                 | 3.5    | 0.0202                          | 2.5     |                                                           |           |            |            |           |      |
|                                                                                                       | Loschbour                                    | Stuttgart | Papuan    | Chimp     | 0.0142                 | 2.6    | 0.0127                          | 1.5     | Loschbour                                                 | Stuttgart | Papuan2    | Chimp      | 0.017     | 2.7  |
|                                                                                                       | Loschbour                                    | Stuttgart | Dai       | Chimp     | 0.0164                 | 3.2    | 0.021                           | 2.8     | Loschbour                                                 | Stuttgart | Dai2       | Chimp      | 0.018     | 2.9  |
|                                                                                                       | MA1                                          | Stuttgart | Papuan    | Chimp     | 0.0139                 | 2.2    | 0.0103                          | 1.0     | MA1                                                       | Stuttgart | Papuan2    | Chimp      | 0.018     | 2.8  |
|                                                                                                       | MA1                                          | Stuttgart | Dai       | Chimp     | 0.0174                 | 3.0    | 0.016                           | 1.7     | MA1                                                       | Stuttgart | Dai2       | Chimp      | 0.028     | 4.3  |
|                                                                                                       | Motala12                                     | Stuttgart | Papuan    | Chimp     | 0.0182                 | 3.2    | 0.011                           | 1.1     | Motala12                                                  | Stuttgart | Papuan2    | Chimp      | 0.023     | 3.7  |
|                                                                                                       | Motala12                                     | Stuttgart | Dai       | Chimp     | 0.0156                 | 2.8    | 0.0149                          | 1.6     | Motala12                                                  | Stuttgart | Dai2       | Chimp      | 0.02      | 3.2  |
|                                                                                                       | LaBrana                                      | Stuttgart | Papuan    | Chimp     | 0.0123                 | 2.3    | 0.0101                          | 1.1     | LaBrana                                                   | Stuttgart | Papuan2    | Chimp      | 0.02      | 3.2  |
| LaBrana                                                                                               | Stuttgart                                    | Dai       | Chimp     | 0.0149    | 2.9                    | 0.0228 | 2.5                             | LaBrana | Stuttgart                                                 | Dai2      | Chimp      | 0.024      | 3.7       |      |
| Native Americans closer to ANE than to WHG                                                            | Karitiana                                    | Chimp     | MA1       | Loschbour | 0.0467                 | 7.1    | 0.0467                          | 4.4     | Karitiana2                                                | Chimp     | MA1        | Loschbour  | 0.052     | 7.1  |
| West Eurasians closer to Native Americans than to other Eastern non-Africans                          | Stuttgart                                    | Chimp     | Karitiana | Papuan    | 0.0559                 | 10.9   | 0.0474                          | 6.6     | Stuttgart                                                 | Chimp     | Karitiana2 | Papuan2    | 0.052     | 7.6  |
|                                                                                                       | Stuttgart                                    | Chimp     | Karitiana | Onge      | 0.0237                 | 5.1    | 0.0179                          | 2.6     |                                                           |           |            |            |           |      |
| Ancient Eurasian hunter-gatherers equally related to Eastern non-Africans other than Native Americans | Loschbour                                    | MA1       | Dai       | Chimp     | -0.0015                | -0.2   | 0.0016                          | 0.2     | Loschbour                                                 | MA1       | Dai2       | Chimp      | -0.013    | -1.9 |
|                                                                                                       | Loschbour                                    | MA1       | Papuan    | Chimp     | 0.0002                 | 0.0    | 0.0012                          | 0.1     | Loschbour                                                 | MA1       | Papuan2    | Chimp      | -0.003    | -0.4 |
|                                                                                                       | Loschbour                                    | Motala12  | Dai       | Chimp     | 0.0024                 | 0.4    | 0.009                           | 0.9     | Loschbour                                                 | Motala12  | Dai2       | Chimp      | -0.002    | -0.3 |
|                                                                                                       | Loschbour                                    | Motala12  | Papuan    | Chimp     | -0.0028                | -0.4   | 0.0046                          | 0.5     | Loschbour                                                 | Motala12  | Papuan2    | Chimp      | -0.004    | -0.6 |
|                                                                                                       | MA1                                          | Motala12  | Dai       | Chimp     | 0.0026                 | 0.4    | 0.0047                          | 0.4     | MA1                                                       | Motala12  | Dai2       | Chimp      | 0.01      | 1.5  |
| MA1                                                                                                   | Motala12                                     | Papuan    | Chimp     | -0.0047   | -0.7                   | -0.001 | -0.1                            | MA1     | Motala12                                                  | Papuan2   | Chimp      | -0.004     | -0.5      |      |
| LaBrana and Loschbour are a clade                                                                     | LaBrana                                      | Loschbour | Dai       | Chimp     | -0.0028                | -0.5   | 0.0024                          | 0.3     | LaBrana                                                   | Loschbour | Dai2       | Chimp      | 0.007     | 1.1  |
|                                                                                                       | LaBrana                                      | Loschbour | Papuan    | Chimp     | -0.0031                | -0.5   | -0.0012                         | -0.1    | LaBrana                                                   | Loschbour | Papuan2    | Chimp      | 0.002     | 0.3  |
|                                                                                                       | LaBrana                                      | Loschbour | MA1       | Chimp     | -0.006                 | -0.8   | 0.0101                          | 0.7     | LaBrana                                                   | Loschbour | MA1        | Chimp      | 0.005     | 0.7  |
| SHG closer to ANE than to WHG                                                                         | Motala12                                     | Loschbour | MA1       | Chimp     | 0.0425                 | 5.3    | 0.0353                          | 2.6     | Motala12                                                  | Loschbour | MA1        | Chimp      | 0.042     | 5.9  |
|                                                                                                       | Motala12                                     | LaBrana   | MA1       | Chimp     | 0.0465                 | 5.8    | 0.0347                          | 2.4     | Motala12                                                  | LaBrana   | MA1        | Chimp      | 0.038     | 5.4  |
| LaBrana and Loschbour equally related to Stuttgart                                                    | LaBrana                                      | Loschbour | Stuttgart | Chimp     | -0.0176                | -2.6   | -0.0106                         | -1.0    | LaBrana                                                   | Loschbour | Stuttgart  | Chimp      | -0.012    | -1.8 |

**Extended Data Table 3:** Admixture proportions for European populations. The estimates from the model with minimal assumptions are from SI17. The estimates from the full modeling are from SI14 either by single population analysis or co-fitting population pairs and averaging over fits (these averages are the results plotted in Fig. 2B). Populations that do not fit the models are not reported.

|               | Full modeling of population relationships (individual fits) |       |       | Full modeling of population relationships (averaged fits) |             |       |             |       |             | Modeling of population relationships with minimal assumptions |                |               | Model-based (averaged) - Model with minimal assumptions (Z-score) |        |        |
|---------------|-------------------------------------------------------------|-------|-------|-----------------------------------------------------------|-------------|-------|-------------|-------|-------------|---------------------------------------------------------------|----------------|---------------|-------------------------------------------------------------------|--------|--------|
|               | EEF                                                         | WHG   | ANE   | EEF                                                       |             | WHG   |             | ANE   |             | EEF                                                           | WHG            | ANE           | EEF                                                               | WHG    | ANE    |
|               |                                                             |       |       | Mean                                                      | Range       | Mean  | Range       | Mean  | Range       |                                                               |                |               |                                                                   |        |        |
| Albanian      | 0.781                                                       | 0.092 | 0.127 | 0.781                                                     | 0.772-0.819 | 0.082 | 0.032-0.098 | 0.137 | 0.129-0.158 | 0.595 ± 0.112                                                 | 0.353 ± 0.150  | 0.052 ± 0.049 | 1.658                                                             | -1.807 | 1.741  |
| Ashkenazi_Jew | 0.931                                                       | 0     | 0.069 |                                                           |             |       |             |       |             | 0.938 ± 0.146                                                 | -0.021 ± 0.185 | 0.083 ± 0.049 |                                                                   |        |        |
| Basque        | 0.593                                                       | 0.293 | 0.114 | 0.569                                                     | 0.527-0.616 | 0.335 | 0.255-0.392 | 0.096 | 0.076-0.129 | 0.569 ± 0.091                                                 | 0.315 ± 0.124  | 0.115 ± 0.041 | -0.001                                                            | 0.165  | -0.472 |
| Belarusian    | 0.418                                                       | 0.431 | 0.151 | 0.426                                                     | 0.397-0.464 | 0.408 | 0.338-0.443 | 0.167 | 0.150-0.199 | 0.272 ± 0.094                                                 | 0.554 ± 0.131  | 0.174 ± 0.047 | 1.637                                                             | -1.118 | -0.158 |
| Bergamo       | 0.715                                                       | 0.177 | 0.108 | 0.721                                                     | 0.704-0.793 | 0.163 | 0.061-0.189 | 0.117 | 0.104-0.147 | 0.644 ± 0.125                                                 | 0.248 ± 0.170  | 0.108 ± 0.053 | 0.615                                                             | -0.503 | 0.162  |
| Bulgarian     | 0.712                                                       | 0.147 | 0.141 | 0.718                                                     | 0.707-0.778 | 0.132 | 0.047-0.151 | 0.151 | 0.138-0.175 | 0.556 ± 0.110                                                 | 0.328 ± 0.143  | 0.116 ± 0.043 | 1.469                                                             | -1.372 | 0.804  |
| Croatian      | 0.561                                                       | 0.293 | 0.145 | 0.564                                                     | 0.548-0.586 | 0.285 | 0.242-0.310 | 0.151 | 0.137-0.172 | 0.453 ± 0.122                                                 | 0.407 ± 0.159  | 0.140 ± 0.046 | 0.911                                                             | -0.768 | 0.238  |
| Czech         | 0.495                                                       | 0.338 | 0.167 | 0.489                                                     | 0.460-0.531 | 0.348 | 0.273-0.382 | 0.163 | 0.145-0.196 | 0.402 ± 0.117                                                 | 0.400 ± 0.162  | 0.198 ± 0.050 | 0.744                                                             | -0.322 | -0.698 |
| English       | 0.495                                                       | 0.364 | 0.141 | 0.503                                                     | 0.476-0.536 | 0.353 | 0.296-0.382 | 0.144 | 0.130-0.169 | 0.475 ± 0.091                                                 | 0.357 ± 0.125  | 0.168 ± 0.043 | 0.304                                                             | -0.028 | -0.561 |
| Estonian      | 0.322                                                       | 0.495 | 0.183 | 0.323                                                     | 0.293-0.345 | 0.49  | 0.451-0.520 | 0.187 | 0.172-0.205 | 0.072 ± 0.121                                                 | 0.778 ± 0.176  | 0.150 ± 0.064 | 2.070                                                             | -1.636 | 0.584  |
| French        | 0.554                                                       | 0.311 | 0.135 | 0.563                                                     | 0.537-0.601 | 0.297 | 0.230-0.328 | 0.14  | 0.126-0.169 | 0.498 ± 0.097                                                 | 0.359 ± 0.127  | 0.142 ± 0.039 | 0.672                                                             | -0.487 | -0.060 |
| French_South  | 0.675                                                       | 0.195 | 0.13  | 0.636                                                     | 0.589-0.738 | 0.256 | 0.111-0.323 | 0.108 | 0.088-0.151 | 0.636 ± 0.116                                                 | 0.225 ± 0.165  | 0.140 ± 0.057 | -0.003                                                            | 0.189  | -0.558 |
| Greek         | 0.792                                                       | 0.058 | 0.151 | 0.791                                                     | 0.780-0.816 | 0.048 | 0.019-0.060 | 0.161 | 0.150-0.171 | 0.658 ± 0.098                                                 | 0.255 ± 0.127  | 0.086 ± 0.039 | 1.357                                                             | -1.627 | 1.915  |
| Hungarian     | 0.558                                                       | 0.264 | 0.179 | 0.548                                                     | 0.520-0.590 | 0.279 | 0.199-0.313 | 0.174 | 0.156-0.210 | 0.391 ± 0.109                                                 | 0.454 ± 0.153  | 0.155 ± 0.050 | 1.437                                                             | -1.145 | 0.371  |
| Icelandic     | 0.394                                                       | 0.456 | 0.15  | 0.409                                                     | 0.386-0.424 | 0.448 | 0.409-0.473 | 0.143 | 0.126-0.170 | 0.342 ± 0.102                                                 | 0.476 ± 0.137  | 0.182 ± 0.045 | 0.654                                                             | -0.204 | -0.861 |
| Lithuanian    | 0.364                                                       | 0.464 | 0.172 | 0.352                                                     | 0.327-0.384 | 0.488 | 0.433-0.527 | 0.16  | 0.135-0.184 | 0.248 ± 0.117                                                 | 0.548 ± 0.163  | 0.205 ± 0.052 | 0.886                                                             | -0.367 | -0.864 |
| Maltese       | 0.932                                                       | 0     | 0.068 |                                                           |             |       |             |       |             | 1.298 ± 0.185                                                 | -0.509 ± 0.248 | 0.211 ± 0.079 |                                                                   |        |        |
| Norwegian     | 0.411                                                       | 0.428 | 0.161 | 0.417                                                     | 0.388-0.438 | 0.423 | 0.383-0.450 | 0.16  | 0.140-0.181 | 0.273 ± 0.115                                                 | 0.557 ± 0.161  | 0.170 ± 0.055 | 1.252                                                             | -0.831 | -0.185 |
| Orcadian      | 0.457                                                       | 0.385 | 0.158 | 0.465                                                     | 0.439-0.493 | 0.378 | 0.329-0.403 | 0.157 | 0.140-0.179 | 0.395 ± 0.088                                                 | 0.437 ± 0.122  | 0.168 ± 0.041 | 0.798                                                             | -0.487 | -0.264 |
| Sardinian     | 0.817                                                       | 0.175 | 0.008 | 0.818                                                     | 0.791-0.874 | 0.141 | 0.058-0.182 | 0.041 | 0.026-0.068 | 0.883 ± 0.128                                                 | 0.075 ± 0.166  | 0.042 ± 0.048 | -0.510                                                            | 0.400  | -0.024 |
| Scottish      | 0.39                                                        | 0.428 | 0.182 | 0.408                                                     | 0.387-0.424 | 0.421 | 0.384-0.448 | 0.171 | 0.149-0.201 | 0.286 ± 0.112                                                 | 0.532 ± 0.156  | 0.182 ± 0.053 | 1.091                                                             | -0.712 | -0.210 |
| Sicilian      | 0.903                                                       | 0     | 0.097 |                                                           |             |       |             |       |             | 1.012 ± 0.149                                                 | -0.131 ± 0.199 | 0.119 ± 0.060 |                                                                   |        |        |
| Spanish       | 0.809                                                       | 0.068 | 0.123 | 0.759                                                     | 0.736-0.804 | 0.126 | 0.066-0.170 | 0.115 | 0.091-0.151 | 0.856 ± 0.126                                                 | -0.015 ± 0.165 | 0.160 ± 0.049 | -0.769                                                            | 0.855  | -0.922 |
| Spanish_North | 0.713                                                       | 0.125 | 0.163 | 0.612                                                     | 0.561-0.660 | 0.292 | 0.214-0.365 | 0.096 | 0.072-0.126 | 0.581 ± 0.120                                                 | 0.298 ± 0.158  | 0.121 ± 0.046 | 0.254                                                             | -0.038 | -0.533 |
| Tuscan        | 0.746                                                       | 0.136 | 0.118 | 0.751                                                     | 0.737-0.806 | 0.123 | 0.047-0.145 | 0.126 | 0.114-0.150 | 0.734 ± 0.118                                                 | 0.153 ± 0.160  | 0.113 ± 0.054 | 0.141                                                             | -0.188 | 0.249  |
| Ukrainian     | 0.462                                                       | 0.387 | 0.151 | 0.463                                                     | 0.445-0.491 | 0.376 | 0.322-0.399 | 0.16  | 0.148-0.187 | 0.259 ± 0.123                                                 | 0.596 ± 0.173  | 0.145 ± 0.057 | 1.661                                                             | -1.269 | 0.269  |
| Finnish       |                                                             |       |       |                                                           |             |       |             |       |             | -0.299 ± 0.204                                                | 1.194 ± 0.296  | 0.105 ± 0.105 |                                                                   |        |        |
| Mordovian     |                                                             |       |       |                                                           |             |       |             |       |             | -0.255 ± 0.173                                                | 1.151 ± 0.246  | 0.104 ± 0.090 |                                                                   |        |        |
| Russian       |                                                             |       |       |                                                           |             |       |             |       |             | -0.303 ± 0.211                                                | 1.230 ± 0.301  | 0.072 ± 0.106 |                                                                   |        |        |
